# Supplementary material
Source: Research Square preprint supplement (doi:10.21203/rs.3.rs-9707067/v1)

**GA**


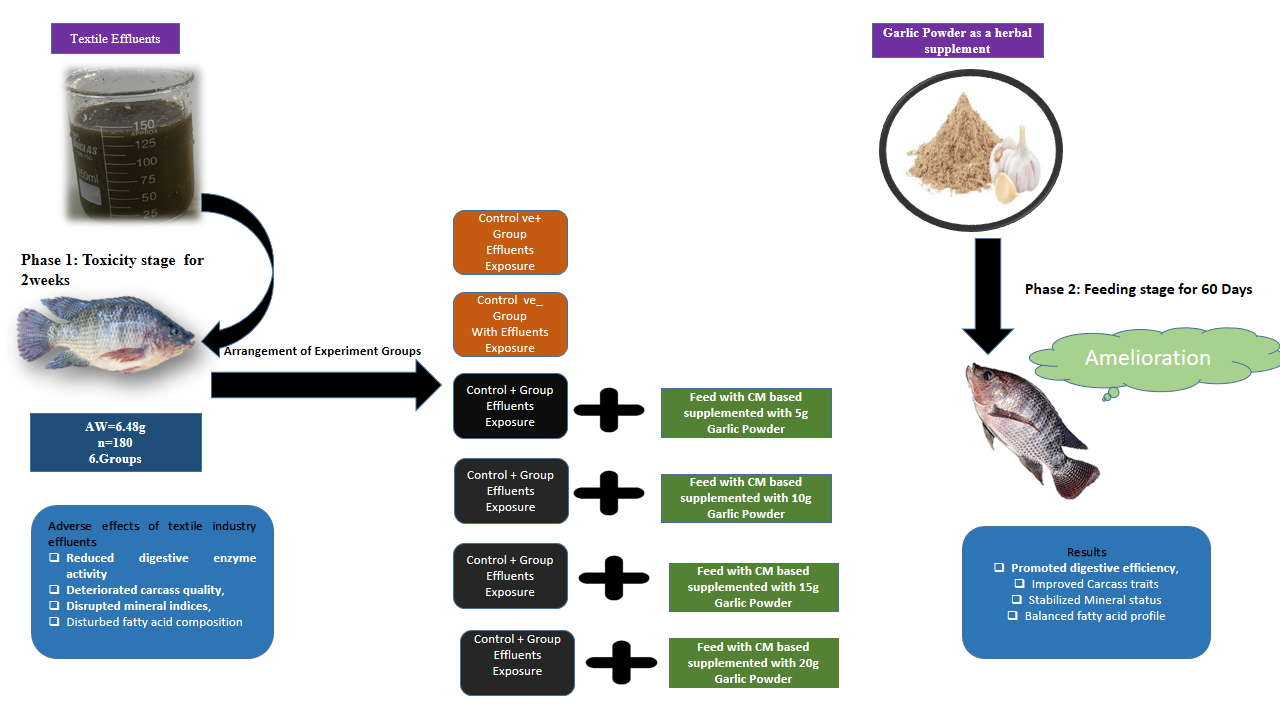

Supplement: Supplementary file 1 [file 9992b7d5325a6c84bae33db2.docx]
